# Supplementary material for: Design and Implementation of Degenerate Microsatellite Primers for the Mammalian Clade
Source: PLoS One. 2011 Dec 27;6(12):e29582. doi: 10.1371/journal.pone.0029582 (PMC3246486; doi:10.1371/journal.pone.0029582)
Supplement: Information S1 — Nature and origin of mammalian samples. (PDF) [file pone.0029582.s001.pdf]

### Supporting Information 1: Nature and origin of mammalian samples

| Superorder       | Order           | Common name    | Scientific name                 | Seq <sup>*</sup> | CITES <sup>†</sup> | # <sup>‡</sup> | Type       | Contact                  | Institution                                            |
|------------------|-----------------|----------------|---------------------------------|------------------|--------------------|----------------|------------|--------------------------|--------------------------------------------------------|
| Laurasiatheria   | Cetartiodactyla | Cow            | <i>Bos taurus</i>               | Y                | -                  | 20             | DNA        | J. Hickford              | Lincoln U, New Zealand                                 |
|                  |                 | Sheep          | <i>Ovis aries</i>               | Y                | -                  | 20             | DNA        | J. Hickford              | Lincoln U, NZ                                          |
|                  |                 | Dolphin        | <i>Tursiops aduncus</i>         | N                | -                  | 20             | Tissue     | L. Moller                | Macquarie U, Australia                                 |
|                  |                 | Pilot whale    | <i>Globicephala melas</i>       | N                | II                 | 20             | Tissue     | M. Oremus, S. Baker      | Auckland U, NZ                                         |
|                  | Carnivora       | Cat            | <i>Felis catus</i>              | Y                | -                  | 20             | Blood      | -                        | Gribbles Veterinary, NZ                                |
|                  |                 | Dog            | <i>Canis familiaris</i>         | Y                | -                  | 20             | Blood      | I. Vargas-Jentzsch       | U of Canterbury, NZ                                    |
|                  | Eulipotyphla    | Hedgehog       | <i>Erinaceus europaeus</i>      | Y                | -                  | 20             | DNA        | M. Hale                  | U of Canterbury, NZ                                    |
|                  |                 | Shrew          | <i>Sorex araneus</i>            | Y                | -                  | 20             | Tissue     | G. Yannic, J. Hausser    | U of Lausanne, Switzerland                             |
| Euarchontoglires | Rodentia        | Mouse          | <i>Mus musculus</i>             | Y                | -                  | 20             | DNA        | D. Tautz                 | Köln U, Germany                                        |
|                  |                 | Rat            | <i>Rattus norvegicus</i>        | Y                | -                  | 20             | Tissue     | B. Robertson             | U of Canterbury, NZ                                    |
|                  | Primates        | Human          | <i>Homo sapiens</i>             | Y                | -                  | 20             | DNA        | A. Amanzadeh, F. Shokri  | National Cell Bank of Iran                             |
|                  |                 | Chimpanzee     | <i>Pan troglodytes</i>          | Y                | II                 | 20             | Outsourced | A. Stone                 | Arizona State U, USA                                   |
| Afrotheria       | Afrosoricida    | Tenrec         | <i>Echinops telfairi</i>        | Y                | -                  | 20             | Tissue     | S. Goodman               | Field Museum, Chicago, USA                             |
|                  | Sirenia         | Dugong         | <i>Dugong dugong</i>            | N                | I                  | 20             | DNA        | A. MacMahon, D. Blair    | James Cook U, Australia                                |
| Australidelphia  | Diprotodontia   | Tammar wallaby | <i>Macropus eugenii</i>         | Y                | -                  | 16             | DNA        | J. Graves                | Australian National U, Australia                       |
|                  | Dasyuridae      | Quoll          | <i>Dasyurus maculatus</i>       | N                | -                  | 20             | Tissue     | M. Cardoso               | U of New South Wales, Australia                        |
| n/a              | Monotremata     | Platypus       | <i>Ornithorhynchus anatinus</i> | Y                | -                  | 20             | DNA        | C. Whittington           | U of Sydney, Australia                                 |
|                  |                 | Echidna        | <i>Tachyglossus aculeatus</i>   | N                | -                  | 20             | DNA/tissue | S. Nicol<br>P. Rismiller | U of Tasmania, Australia<br>Kangaroo Island, Australia |

\* indicates whether genome sequence was partly or completely available at the time of the study

<sup>†</sup> CITES Appendices for listed protected species (<http://www.cites.org/eng/resources/species.html>)

<sup>‡</sup> Number of sourced individual samples
