# Supplementary material for: Design and Implementation of Degenerate Microsatellite Primers for the Mammalian Clade
Source: PubMed Central journal article supplement (PMC3246486; doi:10.1371/journal.pone.0029582), 2011-12-27
Supplement: pone.0029582.s002.pdf [file pone.0029582.s002.pdf]

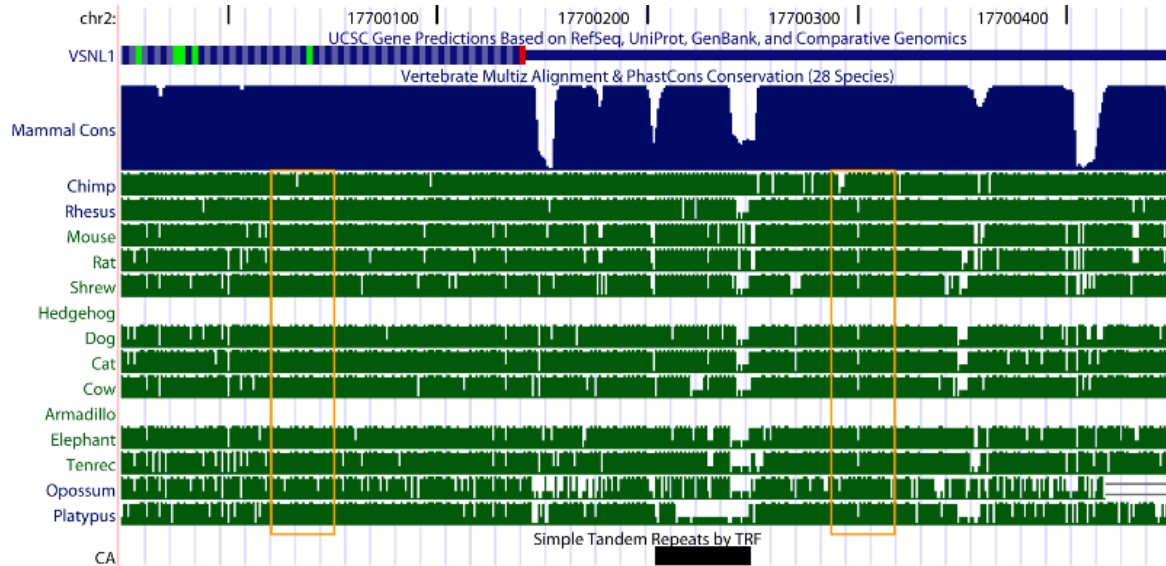

**Supporting Information 2: 28-way alignment of conserved microsatellites.** Both flanking sequences of the conserved microsatellite (represented by the black bar) contain a stretch of orthologous sequences potentially suitable to design cross-species primers (indicated with orange boxes). Locus C2-1218 at chr2:17,699,950-17,700,450 (UCSC hg18).
