# Supplementary material for: Design and Implementation of Degenerate Microsatellite Primers for the Mammalian Clade
Source: PubMed Central journal article supplement (PMC3246486; doi:10.1371/journal.pone.0029582), 2011-12-27
Supplement: pone.0029582.s003.pdf [file pone.0029582.s003.pdf]

**Supporting Information 3: Description of 19 primer pairs selected for PCR optimization.**

| Name     | Sequence                    | DS                |                 |                 |       |                | Expected fragment length (M13 excluded) |     |     |     |            |            |            |            |            |            |            |            |     |                   | Location (Gene) | Genotype | Seq |
|----------|-----------------------------|-------------------|-----------------|-----------------|-------|----------------|-----------------------------------------|-----|-----|-----|------------|------------|------------|------------|------------|------------|------------|------------|-----|-------------------|-----------------|----------|-----|
|          |                             | L <sub>prim</sub> | 2 <sup>nd</sup> | 3 <sup>rd</sup> | %GC   | T <sub>m</sub> | T <sub>init</sub>                       | Hsa | Ptr | Mmu | Rno        | Cfa        | Fca        | Bta        | Sar        | Eeu        | Ete        | Meu        | Oan |                   |                 |          |     |
| C1-2125  | F=TCAGRGAAGCTTGAAGA         | 22                | 1               | -               | 50.00 | 60.24          | 59                                      | 133 | 133 | 143 | 137        | 131        | 145        | 133        | 139        | 135        | ?          | ?          | 276 | 3'-UTR (ZNF238)   |                 |          |     |
|          | R=AGRCTGCTTTAGACCGTACC      | 21                | 1               | -               | 52.38 | 59.80          |                                         |     |     |     |            |            |            |            |            |            |            |            |     |                   |                 |          |     |
| C2-1218  | F=GGAYAAGAACAAAGAYGACCA     | 21                | 2               | -               | 47.62 | 60.14          | 60                                      | 281 | 276 | 295 | 285        | 272        | 273        | 267        | 316        | <b>266</b> | 266        | ?          | 248 | 3'-UTR (VSLN1)    | Y               | Y        |     |
|          | R=TGAMATTCTCATGCACACRAGT    | 19                | 2               | -               | 40.91 | 59.22          |                                         |     |     |     |            |            |            |            |            |            |            |            |     |                   |                 |          |     |
| C2-6868  | F=CTTCCTCCAGAAGCCTCCTT      | 20                | -               | -               | 55.00 | 59.95          | 59                                      | 233 | 233 | 273 | 240        | <b>264</b> | ?          | 233        | 255        | 234        | 276        | ?          | 357 | 3'-UTR (MEIS1)    | Y               | Y        |     |
|          | R=TGGTGRGTAATGAATTAGACATGC  | 25                | 1               | -               | 36.00 | 59.47          |                                         |     |     |     |            |            |            |            |            |            |            |            |     |                   |                 |          |     |
| C2-1915  | F=TCTTCTTCTTAATCACAATTCAGYC | 25                | 1               | -               | 36.00 | 60.14          | 59                                      | 174 | 160 | 197 | 176        | 184        | ?          | 173        | 228        | 172        | ?          | <b>201</b> | 223 | Intron (ZEB2)     | Y               |          |     |
|          | R=CAAACAGCSMCAAACACC        | 18                | 2               | -               | 55.56 | 59.94          |                                         |     |     |     |            |            |            |            |            |            |            |            |     |                   |                 |          |     |
| C3-1615  | F=TGCTGTCTGGTAGRAGGGCT      | 20                | 1               | -               | 55.00 | 60.01          | 59                                      | 233 | 231 | 236 | 235        | 244        | 244        | 233        | 233        | 223        | 221        | ?          | ?   | Intron (ZBTB20)   |                 |          |     |
|          | R=TTTCTGCTCYYGATGTT         | 18                | 2               | -               | 50.00 | 59.17          |                                         |     |     |     |            |            |            |            |            |            |            |            |     |                   |                 |          |     |
| C4-1514  | F=GGCATGTAWGTGGTTTTTGAAC    | 23                | 1               | -               | 39.13 | 60.16          | 58                                      | 282 | 283 | 314 | 275        | 291        | 304        | 278        | <b>322</b> | 322        | <b>280</b> | ?          | 225 | Intron (LCORL)    | Y               | Y        |     |
|          | R=GATCTGGAAACACTGAAGACKC    | 21                | 1               | -               | 52.38 | 59.87          |                                         |     |     |     |            |            |            |            |            |            |            |            |     |                   |                 |          |     |
| C5-1211  | F=ACKTGGCAGCAGACCCTGT       | 19                | 1               | -               | 57.89 | 60.88          | 59                                      | 269 | 269 | 280 | 280        | 258        | <b>266</b> | 260        | 259        | 261        | 263        | ?          | 260 | 3'-UTR (ZNF608)   |                 |          |     |
|          | R=TGGATCACATGGRAAGC         | 18                | 1               | -               | 55.56 | 60.43          |                                         |     |     |     |            |            |            |            |            |            |            |            |     |                   |                 |          |     |
| C6-5453  | F=TTAGTMAAACCATTTGCGACY     | 21                | 2               | -               | 42.86 | 59.99          | 59                                      | 275 | 271 | 261 | <b>259</b> | 266        | 273        | <b>252</b> | ?          | 268        | ?          | <b>244</b> | 273 | 5'-UTR (NRN1)     |                 |          |     |
|          | R=TGGGCGTGRGGCTGWRCT        | 18                | 3               | -               | 61.11 | 60.43          |                                         |     |     |     |            |            |            |            |            |            |            |            |     |                   |                 |          |     |
| C6-1112  | F=AATTGCTGYGCTAATTACAACAT   | 23                | 1               | -               | 34.78 | 60.06          | 59                                      | 153 | 151 | 160 | 162        | 151        | 186        | 147        | ?          | 155        | 144        | <b>150</b> | 146 | IGR (MRDS1)       | Y               |          |     |
|          | R=GACTTCTCCCAWGGCATVA       | 19                | 1               | 1               | 52.63 | 59.57          |                                         |     |     |     |            |            |            |            |            |            |            |            |     |                   |                 |          |     |
| C9-1918  | F=GCCTTGCCAYGACCAYTT        | 18                | 2               | -               | 50.00 | 59.46          | 59                                      | 302 | 313 | 303 | 296        | 301        | <b>330</b> | 307        | ?          | 311        | 323        | ?          | 293 | IGR (PBX3)        | Y               | Y        |     |
|          | R=GCTCYSYCGCTCAATTTAATT     | 20                | 2               | -               | 45.00 | 60.41          |                                         |     |     |     |            |            |            |            |            |            |            |            |     |                   |                 |          |     |
| C11-1417 | F=GGCAARAGACACTAGAGVARTG    | 22                | 2               | 1               | 50.00 | 59.15          | 59                                      | 207 | 218 | 228 | 225        | 179        | 203        | 197        | ?          | 204        | 184        | <b>228</b> | ?   | 3'-UTR (NCAM1)    |                 |          |     |
|          | R=RGYCMAGACGGTCCCAA         | 18                | 3               | -               | 55.56 | 59.02          |                                         |     |     |     |            |            |            |            |            |            |            |            |     |                   |                 |          |     |
| C13-7574 | F=AATCAATATGGAAGGAGCGGT     | 21                | -               | -               | 45.00 | 59.81          | 59                                      | 253 | 255 | 275 | 303        | 254        | 257        | 254        | 253        | 247        | 267        | <b>327</b> | 265 | Intron (BX647243) |                 |          |     |
|          | R=HGCTTTTGTTCAGATGGT        | 20                | 1               | 1               | 42.86 | 60.11          |                                         |     |     |     |            |            |            |            |            |            |            |            |     |                   |                 |          |     |
| C14-2527 | F=GGATGCTGAAATGACAGGC       | 19                | -               | -               | 52.63 | 59.19          | 59                                      | 249 | 251 | 236 | 266        | 262        | ?          | 267        | 245        | ?          | 294        | ?          | ?   | IGR (FOXG1B)      |                 |          |     |
|          | R=GGTCTTCACACAGGGRA         | 18                | 1               | -               | 61.11 | 59.42          |                                         |     |     |     |            |            |            |            |            |            |            |            |     |                   |                 |          |     |
| C14-9692 | F=TTAAGTGATTTTGTAAATGGTCCG  | 24                | -               | -               | 33.33 | 59.35          | 59                                      | 234 | 227 | 234 | 239        | 215        | <b>222</b> | 209        | ?          | ?          | 239        | <b>205</b> | 210 | IGR (BC043585)    | Y               |          |     |
|          | R=YACCTCCAACAACCTTCCGTAAAT  | 23                | 1               | -               | 43.48 | 59.44          |                                         |     |     |     |            |            |            |            |            |            |            |            |     |                   |                 |          |     |
| C15-3531 | F=CCAAGAGGGRTTATTTATGGC     | 21                | 1               | -               | 47.62 | 59.69          | 59                                      | 228 | 226 | 298 | 224        | 240        | 256        | 244        | 265        | 223        | ?          | <b>239</b> | 195 | Intron (BMF)      | Y               |          |     |
|          | R=TGATTTGACACTGKGARGG       | 19                | 2               | -               | 52.63 | 59.46          |                                         |     |     |     |            |            |            |            |            |            |            |            |     |                   |                 |          |     |
| C17-4243 | F=TGCMKAGGTTGCAGAATA        | 18                | 2               | -               | 50.00 | 58.89          | 59                                      | 311 | 313 | 311 | 317        | 307        | ?          | 306        | 314        | <b>305</b> | 325        | ?          | 299 | Intron (HOXB3)    | Y               | Y        |     |
|          | R=TRTCACATTTACGACAATARCATTA | 26                | 2               | -               | 30.77 | 59.87          |                                         |     |     |     |            |            |            |            |            |            |            |            |     |                   |                 |          |     |
| C19-3338 | F=GCTGTCCACCRAGATTACCC      | 20                | 1               | -               | 55.00 | 60.52          | 59                                      | 206 | 204 | 197 | 232        | 260        | ?          | <b>196</b> | 226        | ?          | 197        | <b>170</b> | ?   | IGR (ZNF536)      |                 |          |     |
|          | R=GCATYCCTGCCTTTRACTAA      | 20                | 2               | -               | 50.00 | 60.21          |                                         |     |     |     |            |            |            |            |            |            |            |            |     |                   |                 |          |     |
| C20-3430 | F=GGAAGAATGGCGTAATGCTG      | 20                | -               | -               | 50.00 | 60.61          | 59                                      | 185 | 167 | 201 | <b>177</b> | 180        | <b>173</b> | 162        | 207        | 184        | <b>177</b> | <b>211</b> | ?   | Intron (GDF5)     |                 |          |     |
|          | R=CGTTTCCAATTCYAGATT        | 19                | 1               | -               | 47.37 | 59.92          |                                         |     |     |     |            |            |            |            |            |            |            |            |     |                   |                 |          |     |
| CX-4344  | F=GCCTGATTGATATGMCTGS       | 21                | 2               | -               | 47.62 | 59.55          | 59                                      | 212 | 212 | 216 | 210        | 202        | 196        | 204        | 204        | 226        | 241        | ?          | 214 | 5'-UTR (NDP)      |                 |          |     |
|          | R=AAAGAGGTCYGYTACTTCCA      | 21                | 3               | -               | 47.62 | 59.98          |                                         |     |     |     |            |            |            |            |            |            |            |            |     |                   |                 |          |     |

F: forward primer; R: reverse primer; L<sub>prim</sub>: Primer length; DS: number of secondary (W, S, M, K, R and Y) and tertiary (B, D, H and V) degenerate sites; %GC: G+C content; T<sub>m</sub>: melting temperature; T<sub>init</sub>: initial temperature (see methods); Hsa: human, Ptr: chimpanzee; Mmu: mouse, Rno: rat, Cfa: dog, Fca: cat, Bta: cow, Sar: shrew, Eeu: hedgehog, Ete: tenrec, Meu: tammar wallaby, Oan: platypus; Genotype: indicates if the locus has been genotyped; Seq: indicates if the locus has been sequenced. Expected lengths were calculated based on the 17-WA, or directly from trace files using MegaBLAST (<http://www.ncbi.nlm.nih.gov/BLAST/mmtrace.shtml>) when applicable, i.e. when the sequence is absent in the 17-WA and for tammar wallaby, which is not included in the 17-WA.
