# Supplementary material for: Design and Implementation of Degenerate Microsatellite Primers for the Mammalian Clade
Source: PubMed Central journal article supplement (PMC3246486; doi:10.1371/journal.pone.0029582), 2011-12-27
Supplement: pone.0029582.s005.pdf [file pone.0029582.s005.pdf]

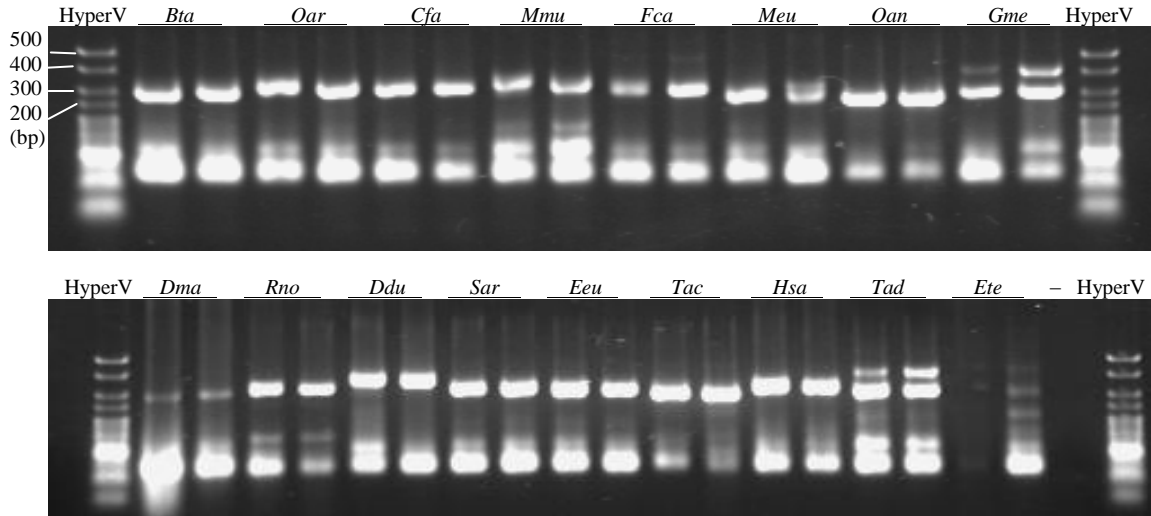

**Supporting Information 5: Electrophoresis of PCR products for C2-1218 in 17 mammals.** *Bta*: cow, *Oar*: sheep, *Cfa*: dog, *Mmu*: mouse, *Fca*: cat, *Meu*: tammam wallaby, *Oan*: platypus, *Gme*: pilot whale, *Dma*: quoll, *Rno*: rat, *Ddu*: dugong, *Sar*: shrew, *Eeu*: hedgehog, *Tac*: echidna, *Hsa*: human, *Tad*: dolphin, *Ete*: tenrec. (negative control: water).
