# Supplementary material for: Design and Implementation of Degenerate Microsatellite Primers for the Mammalian Clade
Source: PubMed Central journal article supplement (PMC3246486; doi:10.1371/journal.pone.0029582), 2011-12-27
Supplement: pone.0029582.s006.pdf [file pone.0029582.s006.pdf]

**Supporting Information 6: Polymorphic Information Content (PIC) at nine cross-species microsatellite loci based on at most 20 individuals per species.**

|                       | <b>C2-1218*</b> | <b>C2-6868*</b> | <b>C2-1915*</b> | <b>C4-1514*</b> | <b>C6-1112</b> | <b>C9-1918</b> | <b>C14-9692</b> | <b>C15-3531</b> | <b>C17-4243*</b> |
|-----------------------|-----------------|-----------------|-----------------|-----------------|----------------|----------------|-----------------|-----------------|------------------|
| <b>Human</b>          | 0.78            | 0               | 0.56            | 0.22            | 0.17           | 0.38           | 0.14            | 0.22            | 0                |
| <b>Chimpanzee</b>     | n/a             | n/a             | n/a             | n/a             | n/a            | n/a            | n/a             | n/a             | n/a              |
| <b>Mouse</b>          | 0.71            | 0.90            | 0.87            | 0.46            | 0.40           | 0              | 0.45            | 0.11            | 0.53             |
| <b>Rat</b>            | 0.29            | 0               | 0.28            | 0               | 0.47           | n/a            | n/a             | 0               | 0                |
| <b>Dog</b>            | 0.79            | 0.46            | 0.73            | 0.11            | n/a            | n/a            | 0               | n/a             | 0                |
| <b>Cat</b>            | 0.78            | n/a             | 0.65            | n/a             | n/a            | n/a            | n/a             | n/a             | 0                |
| <b>Cow</b>            | 0.05            | 0               | 0.20            | 0               | 0              | 0.37           | 0               | 0.05            | 0                |
| <b>Sheep</b>          | 0.78            | 0.33            | 0.57            | 0               | 0              | 0.09           | 0.51            | n/a             | 0                |
| <b>Dolphin</b>        | 0.53            | n/a             | 0.76            | 0.11            | 0.21           | 0.48           | 0.23            | 0               | 0.31             |
| <b>Pilot Whale</b>    | 0               | 0               | 0.73            | 0               | 0              | 0.62           | 0               | 0               | 0                |
| <b>Hedgehog</b>       | 0.62            | 0.10            | 0.46            | 0.36            | 0.25           | 0              | 0.25            | 0.76            | 0                |
| <b>Shrew</b>          | 0.84            | 0.36            | 0               | 0               | n/a            | n/a            | n/a             | n/a             | 0.23             |
| <b>Dugong</b>         | 0.50            | 0.05            | 0               | 0               | 0              | 0              | n/a             | 0               | 0.35             |
| <b>Tenrec</b>         | n/a             | n/a             | n/a             | 0               | n/a            | n/a            | n/a             | n/a             | 0.45             |
| <b>Tammar wallaby</b> | 0.77            | n/a             | 0.06            | 0               | 0              | n/a            | n/a             | 0.90            | 0.60             |
| <b>Quoll</b>          | 0.10            | 0.72            |                 | 0               | 0              | n/a            | 0               | n/a             | 0                |
| <b>Platypus</b>       | 0.12            | 0.64            | 0.32            |                 | 0              | n/a            | 0               | n/a             | 0                |
| <b>Echidna</b>        | 0.51            | 0.58            |                 | 0               | 0              | 0              | 0.69            | 0.08            | 0                |

\* Sequenced loci; n/a : data not available
