# Supplementary material for: Design and Implementation of Degenerate Microsatellite Primers for the Mammalian Clade
Source: PubMed Central journal article supplement (PMC3246486; doi:10.1371/journal.pone.0029582), 2011-12-27
Supplement: pone.0029582.s007.pdf [file pone.0029582.s007.pdf]

**Supporting Information 7: UCSC 28-way alignment of five cross-species microsatellite locus showing species of interest (in order: C2-1218; C2-6868; C2-1915; C4-1514; C17-4243).** (A) Flanking sequences. Underscores represent the microsatellite sequence; positions are counted upstream and downstream from the microsatellite. Boxes indicate primer sites, dashes gaps and dots bases identical to human. (B) Microsatellite sequence. Array length is shown in brackets. UCSC assemblies: Human (hg18), chimp (panTro2), mouse (mm8), rat (rn4), cow (bosTau3), dog (canFam2), cat (felCat3), shrew (sorAra1), hedgehog (eriEur1), armadillo (dasNov1), elephant (loxAfr1), tenrec (echTel1), opossum (monDom4), platypus (ornAna1).

A

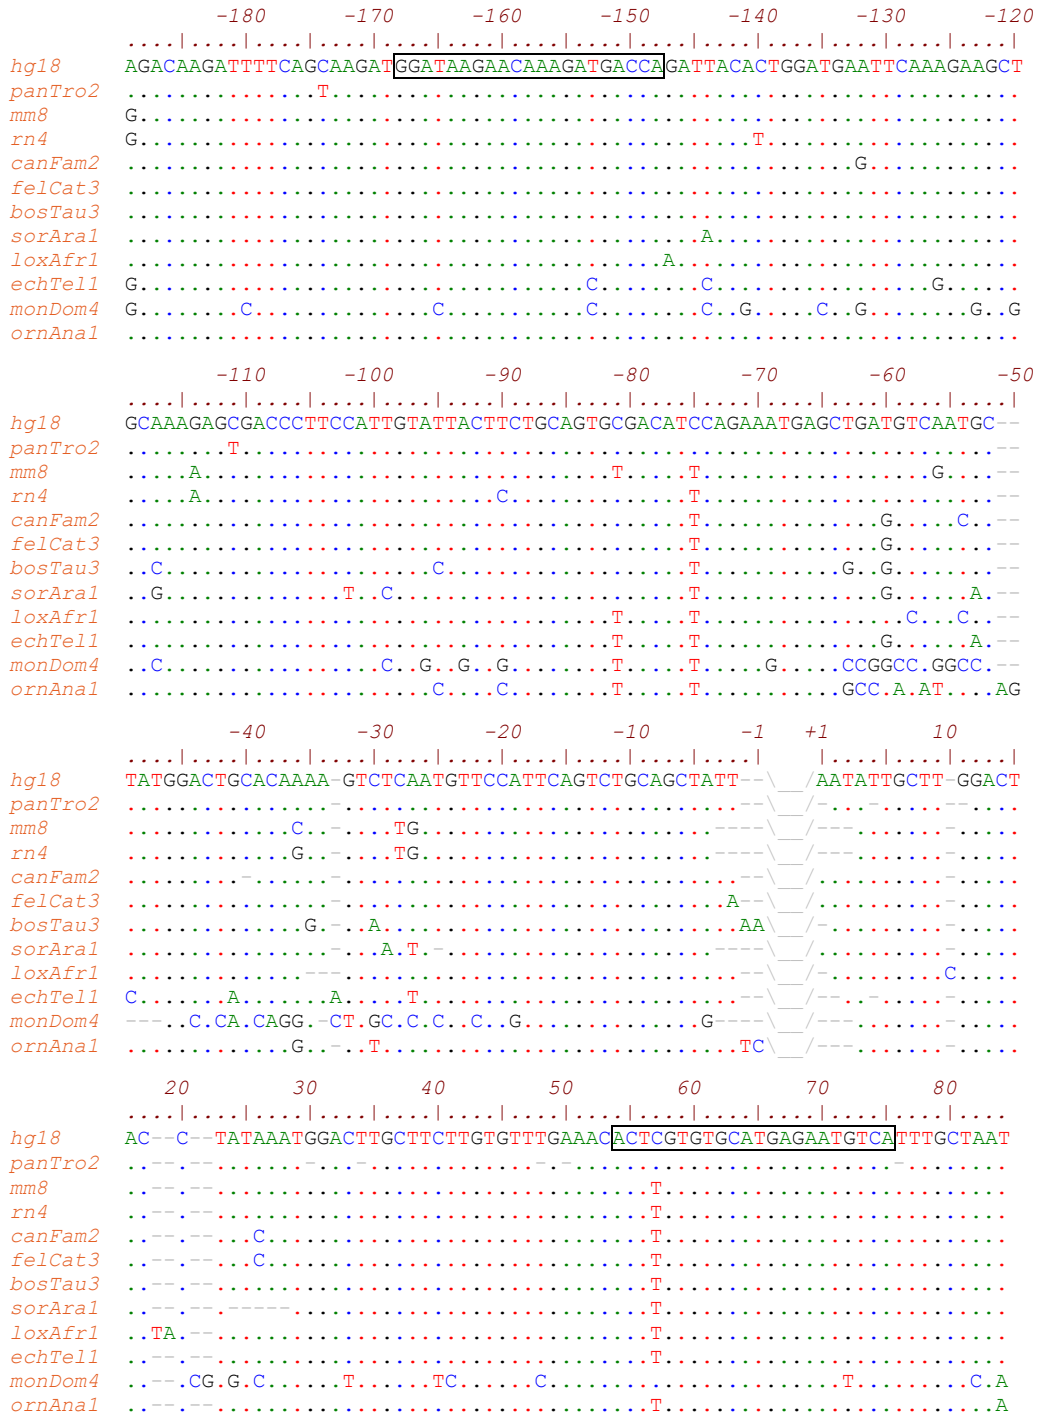

B

- hg18 (46) \((CA)\_{23}/\)
- panTro2 (49) \((CA)\_{24}/\)
- mm8 (65) \((CA)\_{15}(CCACACC)\_4C(CA)\_3/\)
- rn4 (53) \((CA)\_{20}CTA(CA)\_6/\)
- canFam2 (38) \((CA)\_4TA(CA)\_{10}CG(CA)\_3/\)
- felCat3 (38) \((CA)\_{19}/\)
- bosTau3 (31) \((CA)\_{15}G/\)
- sorAra1 (89) \((AC)\_{19}AT(AC)\_5GC(AC)\_5ATGC(AC)\_2A(AC)\_4AT(AC)\_2(AT)\_2/\)
- loxAfr1 (34) \((CA)\_4TA(CA)\_4TA(CA)\_7/\)
- echTel1 (33) \((CA)\_{16}C/\)
- monDom4 (39) \((CA)\_2CTCG(CCCACA)\_2(CTCACA)\_2(CA)\_2CCA/\)
- ornAna1 (12) \((CA)\_4(A)\_4/\)

A

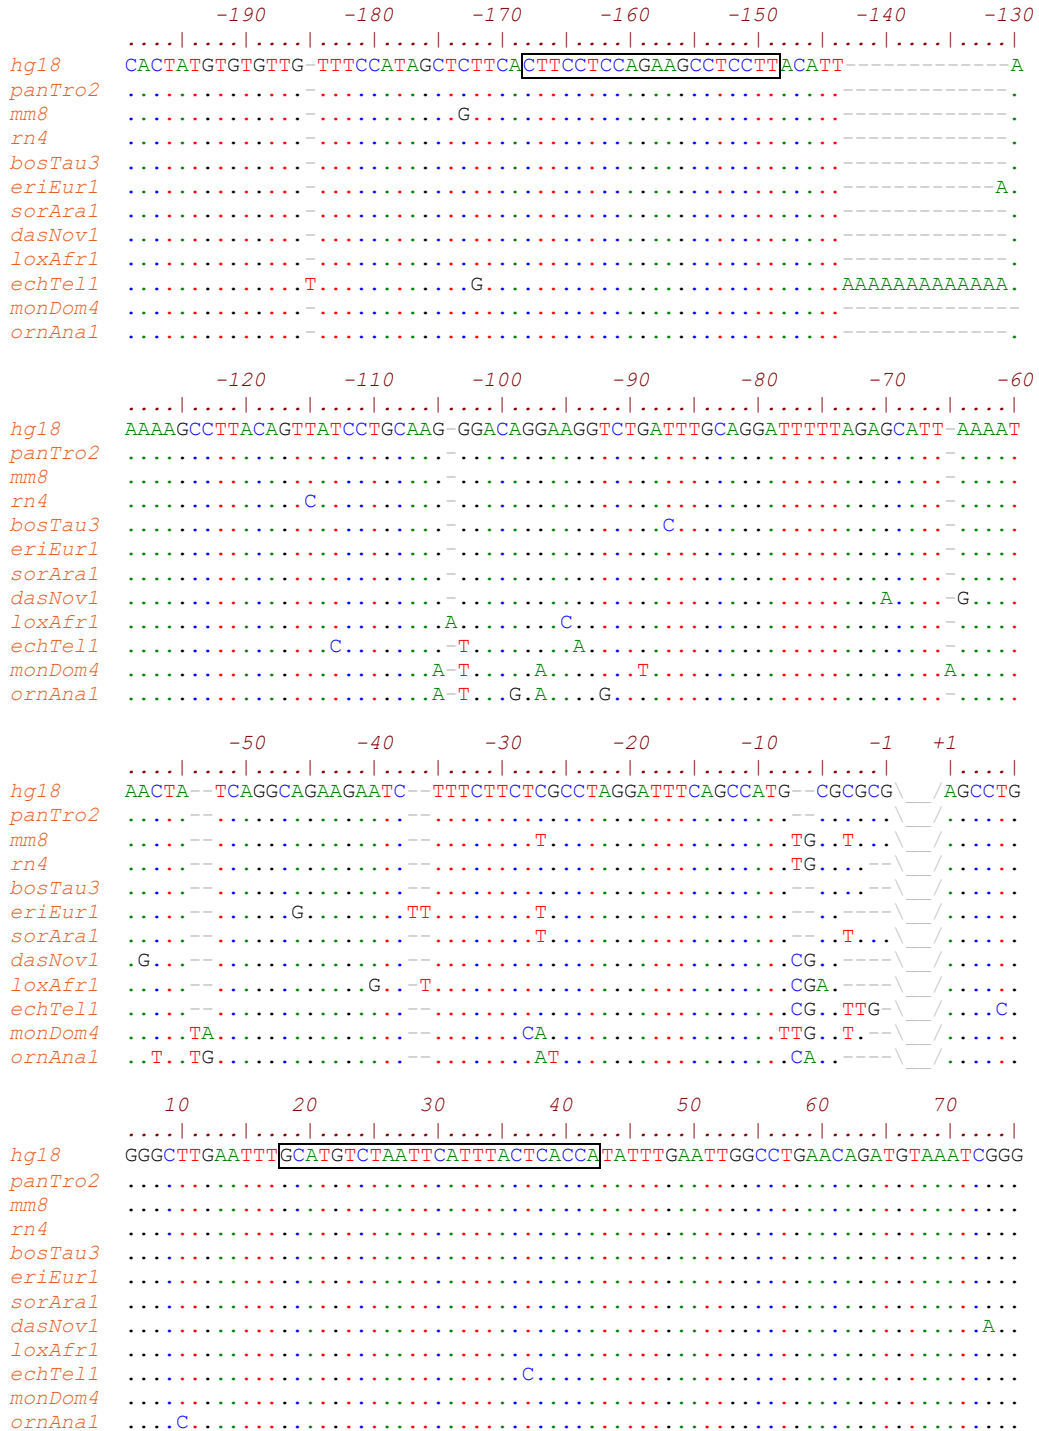

B

- hg18 (42) \((CT)\_5TT(CT)\_4(T)\_4C(CT)\_4CC(CT)\_2TTCT/\)
- panTro2 (42) \((CT)\_5TT(CT)\_4(T)\_4C(CT)\_4CC(CT)\_2TTCT/\)
- mm8 (80) \((CT)\_{29}T(CTC)\_2C(CT)\_2CC(CT)\_2TTCT/\)
- rn4 (50) \((CT)\_7CC(CT)\_6(TC)\_2(CT)\_4CC(CT)\_4/\)
- bosTau3 (42) \((CT)\_5TT(CT)\_5(T)\_4(CT)\_4CC(CT)\_4/\)
- eriEur1 (40) \((CT)\_5AT(CT)\_4(T)\_3C(CT)\_5CC(CT)\_4/\)
- sorAra1 (64) \((CT)\_3TT(CT)\_5TT(CT)\_4CCTT(CT)\_5TCTT(CT)\_4CC(CT)\_4/\)
- dasNov1 (42) \((CT)\_5TT(CT)\_4(T)\_3C(CT)\_4CC(CT)\_4/\)
- loxAfr1 (42) \((CT)\_5TT(CT)\_5TTC(CT)\_4CC(CT)\_4/\)
- echTell1 (71) \((CT)\_{22}T(CT)\_3TC(CT)\_4CC(CT)\_2TTCT/\)
- monDom4 (42) \((CT)\_{11}TT(CT)\_4CCTT(CT)\_3/\)
- ornAna1 (166) \((CT)\_3TGCTCATCTTTCTGGCCTGT(CT)\_2(C)\_5(CT)\_2GTC(T)\_4G(CT)\_2(CCCT)\_2(CT)\_4\|
- \|CC(CT)\_5(C)\_8TTACA(CT)\_6AC(CT)\_3CCT(C)\_4ATGACTGTTCCTCCCTCCCATTTCT\|
- \|(C)\_9AT(CT)\_4TCCT/\)

C2-6868

A

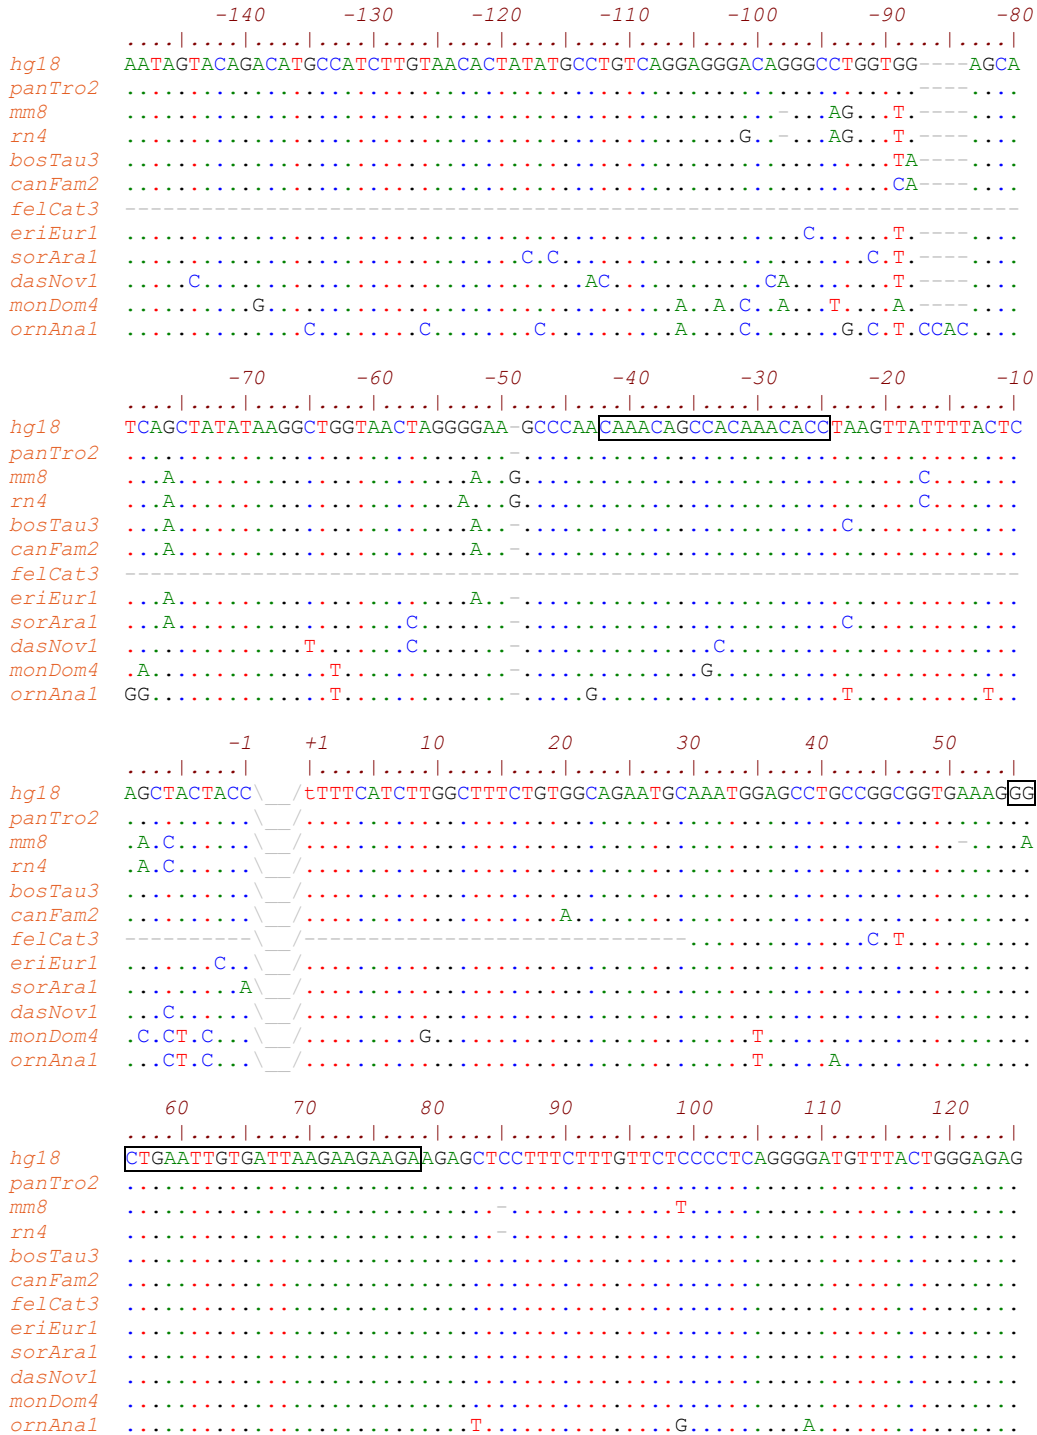

B

- hg18 (51) \CTGTGC(CT)<sub>15</sub>TT(TC)<sub>5</sub>TTC/  
panTro2 (37) \CTGTGC(CT)<sub>14</sub>TTCT/  
mm8 (75) \((CT)<sub>2</sub>GAGC(CT)<sub>2</sub>CC(CT)<sub>14</sub>GT(CT)<sub>2</sub>GT(CT)<sub>12</sub>C/  
rn4 (53) \((CT)<sub>2</sub>GC(CT)<sub>23</sub>C/  
bosTau3 (50) \((CT)<sub>2</sub>GC(CT)<sub>2</sub>T(CT)<sub>7</sub>(C)<sub>4</sub>(CT)<sub>9</sub>TTC/  
canFam2 (61) \((CT)<sub>3</sub>(CCT)<sub>2</sub>(CTCTCCT)<sub>2</sub>(CT)<sub>16</sub>TTC/  
felCat3 -  
eriEur1 (50) \((CT)<sub>2</sub>GCCTGCTT(CT)<sub>15</sub>TTCTTTC/  
sorAra1 (105) \CAT(TC)<sub>2</sub>TG(TC)<sub>2</sub>TG(CCTCT)<sub>2</sub>GC(CTCTGT)<sub>2</sub>(CT)<sub>4</sub>(GTCTCT)<sub>2</sub>(CTGTCT)<sub>2</sub>\\  
\\(CT)<sub>7</sub>(C)<sub>3</sub>(T)<sub>3</sub>(C)<sub>3</sub>(TC)<sub>2</sub>CC(TC)<sub>3</sub>TFTC/  
dasNov1 (67) \((CT)<sub>2</sub>GCCTT(CT)<sub>9</sub>GT(CT)<sub>3</sub>GT(CT)<sub>5</sub>TT(CT)<sub>8</sub>TTC/  
monDom4 (153) \((CT)<sub>2</sub>GCT(C)<sub>6</sub>ACC(T)<sub>3</sub>(CT)<sub>19</sub>CA(CT)<sub>44</sub>A(T)<sub>4</sub>/  
ornAna1 (100) \ CTGTTC(T)<sub>6</sub>C(A)<sub>5</sub>(T)<sub>5</sub>ATC(CCT)<sub>7</sub>(CTT)<sub>2</sub>T(CT)<sub>2</sub>T(CT)<sub>2</sub>CC(CT)<sub>4</sub>TT(CT)<sub>5</sub>(T)3A(T)<sub>7</sub>CCTC /

C2-1915

**A**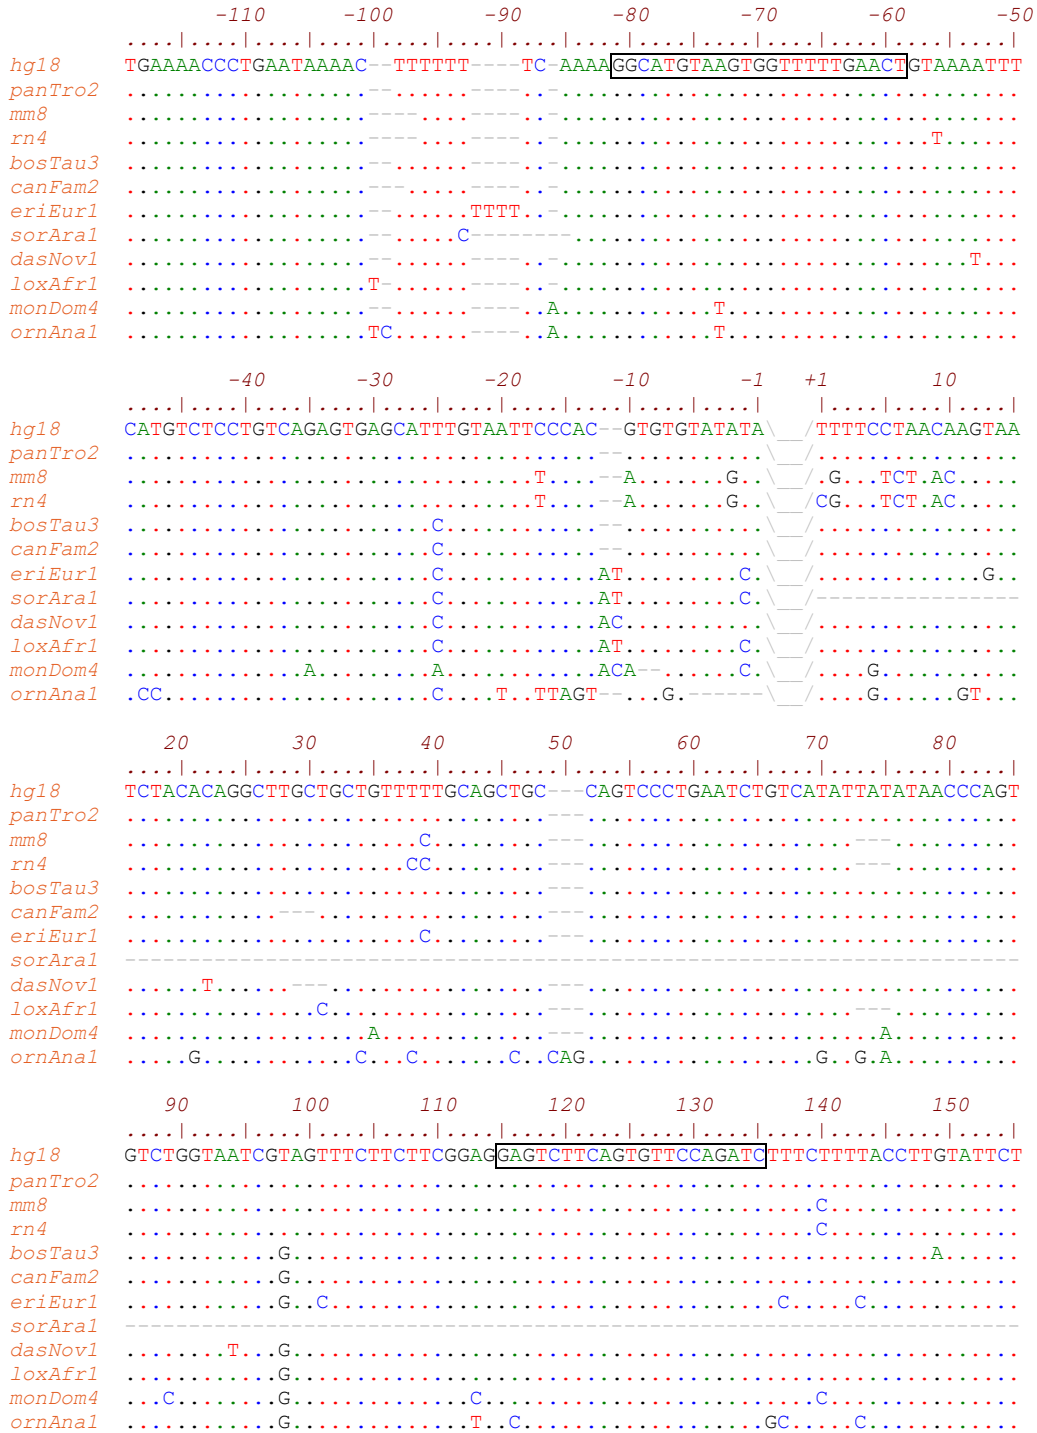**B**

- hg18 (70) \GA(CA)<sub>3</sub>AATA(CA)<sub>2</sub>CC(TG)<sub>2</sub>(CA)<sub>2</sub>TA(CA)<sub>4</sub>CGC(A)<sub>3</sub>(CA)<sub>9</sub>CT(CA)<sub>2</sub>AACA/  
 panTro2 (71) \GA(CA)<sub>3</sub>AATA(CA)<sub>2</sub>CC(TG)<sub>2</sub>(CA)<sub>2</sub>TA(CA)<sub>4</sub>GC(A)<sub>3</sub>(CA)<sub>9</sub>C(CA)<sub>3</sub>AACA/  
 mm8 (104) \GATA(CA)<sub>5</sub>AAGACT(CA)<sub>2</sub>TA(CA)<sub>4</sub>TGTA(CA)<sub>2</sub>TACATTCCCT(GCAC)<sub>2</sub>A(CG)<sub>3</sub>(CA)<sub>4</sub>(CT)<sub>2</sub>(CA)<sub>10</sub>\  
 \|GTCTCG(CA)<sub>2</sub>/  
 rn4 (66) \GATA(CA)<sub>6</sub>AAGACT(CA)<sub>3</sub>C<sub>3</sub>TTGTA(CA)<sub>3</sub>CC(CA)<sub>5</sub>CC(CA)<sub>5</sub>/  
 bosTau3 (66) \GA(CA)<sub>3</sub>(A)<sub>4</sub>(CA)<sub>2</sub>CC(TG)<sub>2</sub>(CA)<sub>2</sub>TA(CA)<sub>2</sub>AA(CA)<sub>3</sub>TACACGTCACG(CA)<sub>2</sub>TACA(C)<sub>3</sub>G/  
 canFam2 (82) \GA(CA)<sub>3</sub>AA(CA)<sub>3</sub>CC(TG)<sub>2</sub>(CA)<sub>2</sub>TA(CA)<sub>6</sub>CGCCAACG(CA)<sub>2</sub>TA(CA)<sub>3</sub>CG(CA)<sub>2</sub>TA(CA)<sub>3</sub>AACA/  
 eriEur1 (107) \((CA)<sub>4</sub>(A)<sub>5</sub>TA(CA)<sub>3</sub>CC(T)<sub>3</sub>(GC)<sub>2</sub>AC(GC)<sub>2</sub>GT(GC)<sub>3</sub>A(CA)<sub>2</sub>TA(CA)<sub>12</sub>TATGC(A)<sub>3</sub>(CA)<sub>7</sub>TA(CA)<sub>3</sub>AATA/  
 sorAra1 -  
 dasNov1 (48) \GACACGC(A)<sub>3</sub>(CA)<sub>3</sub>CC(TG)<sub>2</sub>(CA)<sub>2</sub>TA(CA)<sub>4</sub>CG(CA)<sub>3</sub>TACA/  
 loxAfr1 (64) \GA(CA)<sub>3</sub>AATA(CA)<sub>2</sub>CC(TG)<sub>2</sub>(CA)<sub>2</sub>TA(CA)<sub>4</sub>CGC(A)<sub>3</sub>(CA)<sub>6</sub>(CG)<sub>2</sub>C(A)<sub>3</sub>CA/  
 monDom4 (75) \GA(CATACA)<sub>2</sub>T(C)<sub>3</sub>AGTGCG(CA)<sub>2</sub>CG(CA)<sub>5</sub>CG(CA)<sub>2</sub>CT(CA)<sub>3</sub>(TA)<sub>2</sub>(CAAA)<sub>2</sub>(CA)<sub>3</sub>TCA/  
 ornAna1 (16) \((C)<sub>10</sub>(A)<sub>4</sub>CA/

**C4-1514**

A

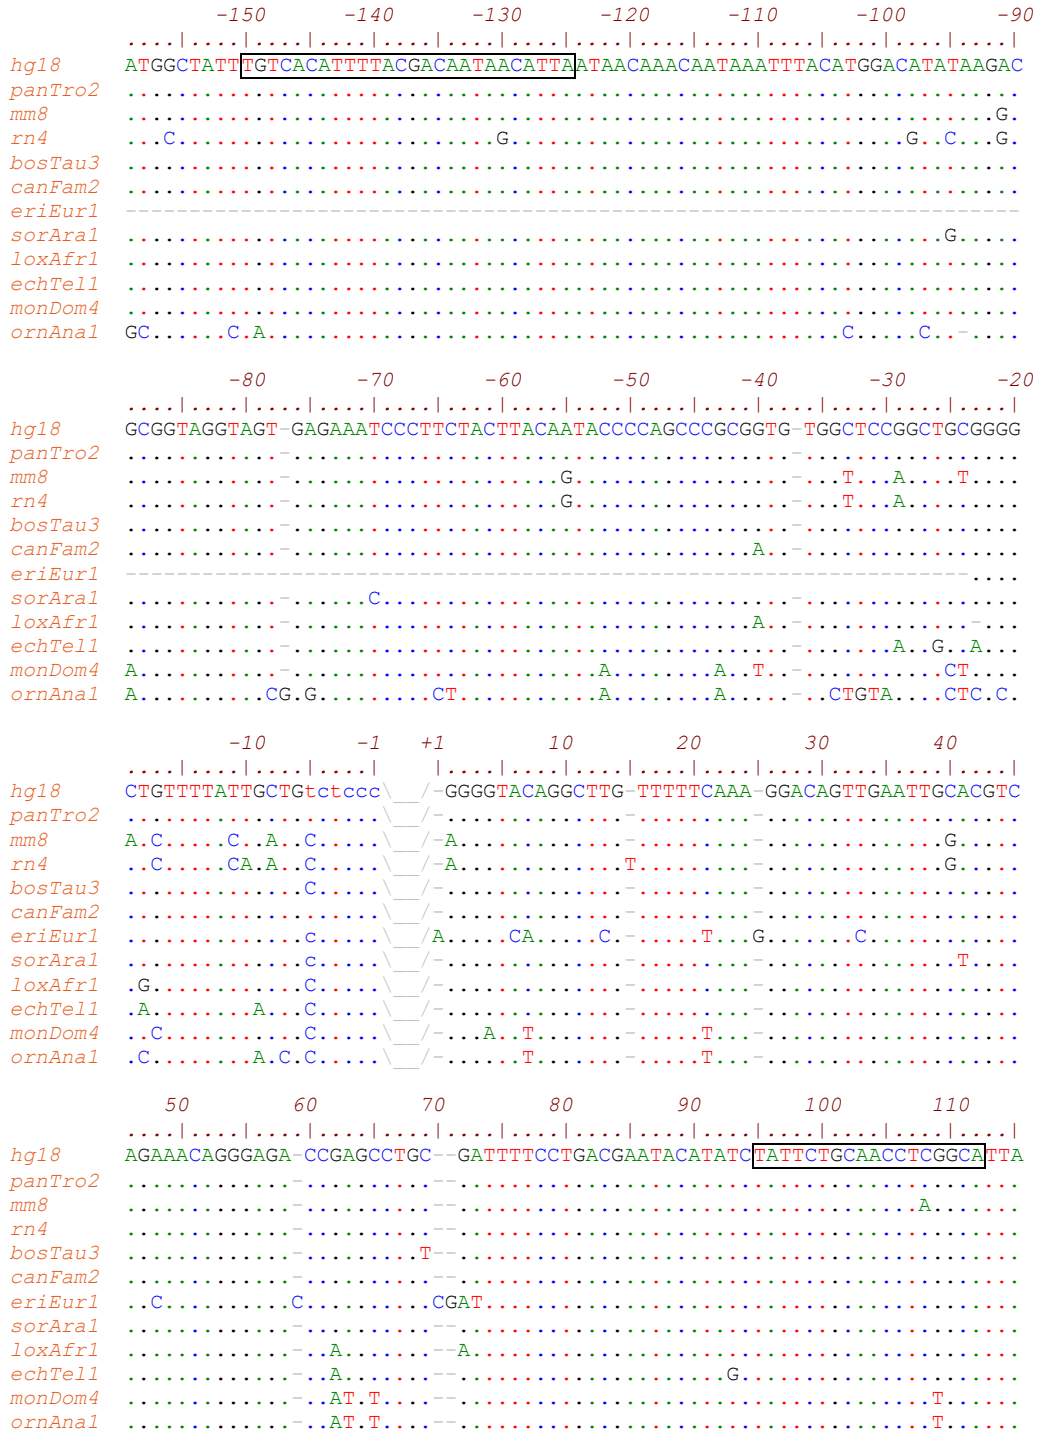

B

hg18 (55) \((TTTC)\_2(TC)\_7CC(TC)\_5(C)\_5(TC)\_2(T)\_8(TC)\_2/\)  
 panTro2 (57) \((TTTC)\_2(TC)\_7CC(TC)\_5(C)\_4(TC)\_3(T)\_9(TC)\_2/\)  
 mm8 (55) \((TTTC)\_2(TC)\_5CC(TC)\_3(T)\_5(TC)\_2/\)  
 rn4 (60) \((TTTC)\_2(TC)\_7CC(TC)\_5(C)\_4(TC)\_3(T)\_7(TC)\_2/\)  
 bosTau3 (50) \((TC)\_2(T)\_4(TC)\_6CC(TC)\_4(C)\_4(TC)\_2(T)\_8(TC)\_2/\)  
 canFam2 (51) \((TC)\_2(T)\_4(TC)\_7CC(TC)\_3(C)\_4(TC)\_3(T)\_7(TC)\_2/\)  
 eriEur1 (52) \((TTC)\_2(TA)(TCC)\_2(TCC)\_2CCTT(TCT)\_2(C)\_5(TCT)\_2(T)\_5(TC)\_2/\)  
 sorAra1 (58) \((TC)\_2TT(TC)\_9CC(TC)\_6(C)\_4(TC)\_2(T)\_8(TC)\_2/\)  
 loxAfr1 (54) \((TC)\_2(T)\_4(TC)\_5CC(TC)\_5(C)\_4(TC)\_3(T)\_10(TC)\_2/\)  
 echTel1 (68) \((TGTCTT(TC)\_8CC(TC)\_3TT(TC)\_2(C)\_4(TC)\_3(C)\_3(TC)\_6(T)\_5(TC)\_2/\)  
 monDom4 (55) \((TCTT(TC)\_9TT(TC)\_5(C)\_4(TC)\_4(T)\_5(TC)\_2/\)  
 ornAna1 (42) \((TC)\_2(T)\_4(TC)\_4CCTTGC(TC)\_2CC(TC)\_3(T)\_5TCTT/\)
