# Supplementary material for: Design and Implementation of Degenerate Microsatellite Primers for the Mammalian Clade
Source: PubMed Central journal article supplement (PMC3246486; doi:10.1371/journal.pone.0029582), 2011-12-27
Supplement: pone.0029582.s008.pdf [file pone.0029582.s008.pdf]

## Supporting Information 8: Allele length, and microsatellite length and sequence variation

in at most four individuals for five cross-species microsatellite loci.  $L_{\text{allele}}$ : allele length (bp);

$L_{\text{micro}}$ : microsatellite length (bp); an individual (Indiv 1) is used as a reference to measure length variation (+/-).

### C2-1218

| Species     | Indiv   | $L_{\text{allele}}$ | $L_{\text{micro}}$ | Sequence                                                                  |
|-------------|---------|---------------------|--------------------|---------------------------------------------------------------------------|
| Human       | 1       | 280                 | 48                 | (CA) <sub>24</sub>                                                        |
|             | 2,4     | +1                  | 0                  | (CA) <sub>24</sub>                                                        |
|             | 3       | -2                  | -2                 | (CA) <sub>23</sub>                                                        |
| Chimp       | 1,3     | <i>n/a</i>          | 50                 | (CA) <sub>25</sub>                                                        |
|             | 2       |                     | -8                 | (CA) <sub>19</sub>                                                        |
|             | 4       |                     | +4                 | (CA) <sub>27</sub>                                                        |
| Mouse       | 1       | 291                 | 64                 | (CA) <sub>18</sub> (CCACACC) <sub>3</sub> C(CA) <sub>3</sub>              |
|             | 2       | +5                  | +5                 | (CA) <sub>17</sub> (CCACACC) <sub>4</sub> C(CA) <sub>3</sub>              |
|             | 3       | +9                  | +9                 | (CA) <sub>19</sub> (CCACACC) <sub>4</sub> C(CA) <sub>3</sub>              |
|             | 4       | +7                  | +7                 | (CA) <sub>18</sub> (CCACACC) <sub>4</sub> C(CA) <sub>3</sub>              |
| Rat         | 1,2,3,4 | 276                 | 49                 | (CA) <sub>17</sub> CTA(CA) <sub>6</sub>                                   |
| Dog         | 1       | 274                 | 44                 | (CA) <sub>4</sub> TA(CA) <sub>13</sub> CG(CA) <sub>3</sub>                |
|             | 2,4     | -6                  | -6                 | (CA) <sub>4</sub> TA(CA) <sub>10</sub> CG(CA) <sub>3</sub>                |
|             | 3       | -4                  | -4                 | (CA) <sub>4</sub> TA(CA) <sub>11</sub> CG(CA) <sub>3</sub>                |
| Cat         | 1       | 265                 | 38                 | (CA) <sub>19</sub>                                                        |
|             | 2,3,4   | +6                  | +2                 | (CA) <sub>20</sub>                                                        |
| Cow         | 1       | 269                 | 28                 | (CA) <sub>12</sub> (GA) <sub>2</sub>                                      |
|             | 3,4     | 0                   | 0                  | (CA) <sub>13</sub> GA                                                     |
| Sheep       | 1       | 276                 | 43                 | (CA) <sub>11</sub> CG(CA) <sub>4</sub> (C) <sub>3</sub> (CA) <sub>4</sub> |
|             | 2,4     | -6                  | -6                 | (CA) <sub>13</sub> (C) <sub>3</sub> (CA) <sub>4</sub>                     |
|             | 3       | +2                  | +2                 | (CA) <sub>12</sub> CG(CA) <sub>4</sub> (C) <sub>3</sub> (CA) <sub>4</sub> |
| Dolphin     | 1       | 264                 | 32                 | (CA) <sub>16</sub>                                                        |
|             | 2       | +4                  | +4                 | (CA) <sub>18</sub>                                                        |
| Pilot Whale | 1,2,3,4 | 265                 | 34                 | (CA) <sub>8</sub> TA(CA) <sub>8</sub>                                     |
| Hedgehog    | 2       | 260                 | 40                 | (CA) <sub>20</sub>                                                        |
|             | 3       | 0                   | +4                 | (CA) <sub>22</sub>                                                        |
|             | 4       | +8                  | -2                 | (CA) <sub>19</sub>                                                        |
| Dugong      | 1       | 270                 | 38                 | (CA) <sub>4</sub> CG(CA) <sub>14</sub>                                    |
|             | 2,4     | +1                  | +2                 | (CA) <sub>4</sub> CG(CA) <sub>15</sub>                                    |
|             | 3       | +2                  | 0                  | (CA) <sub>4</sub> CG(CA) <sub>15</sub>                                    |
| T. wallaby  | 1,3     | 251                 | 41                 | (CA) <sub>13</sub> CG(CA) <sub>5</sub> ACA                                |
| Platypus    | 2,3,4   | 245                 | 12                 | (CA) <sub>4</sub> (A) <sub>4</sub>                                        |

### C2-6868

| Species     | Indiv   | $L_{\text{allele}}$ | $L_{\text{micro}}$ | Sequence                                                                                                                  |
|-------------|---------|---------------------|--------------------|---------------------------------------------------------------------------------------------------------------------------|
| Human       | 1,2     | 228                 | 42                 | (CT) <sub>5</sub> TT(CT) <sub>4</sub> (T) <sub>4</sub> C(CT) <sub>4</sub> CC(CT) <sub>2</sub> TTCT                        |
| Chimp       | 1,2,3,4 | <i>n/a</i>          | 42                 | (CT) <sub>5</sub> TT(CT) <sub>4</sub> (T) <sub>4</sub> C(CT) <sub>4</sub> CC(CT) <sub>2</sub> TTCT                        |
| Rat         | 2,3     | 236                 | 50                 | (CT) <sub>7</sub> CC(CT) <sub>6</sub> (TC) <sub>2</sub> (CT) <sub>4</sub> CC(CT) <sub>4</sub>                             |
| Dog         | 4       | 262                 | 76                 | (CT) <sub>8</sub> CCTT(CT) <sub>12</sub> TT(CT) <sub>3</sub> TTCC(CT) <sub>5</sub> CC(CT) <sub>4</sub>                    |
| Cow         | 1,2,3,4 | 231                 | 44                 | (CT) <sub>5</sub> TT(CT) <sub>5</sub> (T) <sub>4</sub> (CT) <sub>4</sub> CC(CT) <sub>4</sub>                              |
| Sheep       | 2       | 231                 | 44                 | (CT) <sub>5</sub> TT(CT) <sub>5</sub> (T) <sub>4</sub> (CT) <sub>4</sub> CC(CT) <sub>4</sub>                              |
|             | 4       | -2                  | -2                 | (CT) <sub>5</sub> TT(CT) <sub>4</sub> (T) <sub>4</sub> (CT) <sub>4</sub> CC(CT) <sub>4</sub>                              |
| Dolphin     | 3,4     | <i>n/a</i>          | 56                 | (CT) <sub>5</sub> GTC(T) <sub>3</sub> (CT) <sub>9</sub> (T) <sub>3</sub> C(CT) <sub>4</sub> CC(CT) <sub>4</sub>           |
| Pilot Whale | 3       | 243                 | 56                 | (CT) <sub>5</sub> GTC(T) <sub>3</sub> (CT) <sub>9</sub> (T) <sub>3</sub> C(CT) <sub>4</sub> CC(CT) <sub>4</sub>           |
| Hedgehog    | 3,4     | 230                 | 44                 | (CT) <sub>5</sub> AT(CT) <sub>4</sub> (T) <sub>3</sub> C(CT) <sub>5</sub> CC(CT) <sub>4</sub>                             |
| Shrew       | 1,4     | 256                 | 68                 | (CT) <sub>3</sub> TT(CT) <sub>7</sub> TT(CT) <sub>4</sub> CCTT(CT) <sub>5</sub> TCTT(CT) <sub>4</sub> CC(CT) <sub>4</sub> |
|             | 2       | -2                  | 0                  | (CT) <sub>3</sub> TT(CT) <sub>7</sub> TT(CT) <sub>4</sub> CCTT(CT) <sub>5</sub> TCTT(CT) <sub>4</sub> CC(CT) <sub>4</sub> |
| Dugong      | 1,3,4   | 225                 | 40                 | (CT) <sub>5</sub> TT(CT) <sub>3</sub> (T) <sub>3</sub> C(CT) <sub>4</sub> TC(CT) <sub>4</sub>                             |

**C2-1915**

| Species  | Indiv   | L <sub>allele</sub> | L <sub>micro</sub> | Sequence                                                                                                                                                                                                    |
|----------|---------|---------------------|--------------------|-------------------------------------------------------------------------------------------------------------------------------------------------------------------------------------------------------------|
| Human    | 1,2,3,4 | 283                 | 49                 | CTGTGC(CT) <sub>14</sub> TT(TC) <sub>5</sub> TTC                                                                                                                                                            |
| Chimp    | 1,2,3   | <i>n/a</i>          | 37                 | CTGTGC(CT) <sub>14</sub> TTC                                                                                                                                                                                |
|          | 4       |                     | +2                 | CTGTGC(CT) <sub>15</sub> TTC                                                                                                                                                                                |
| Rat      | 2,3,4   | 273                 | 57                 | (CT) <sub>2</sub> GC(CT) <sub>25</sub> C                                                                                                                                                                    |
| Cow      | 1,3,4   | 169                 | 50                 | (CT) <sub>2</sub> GC(CT) <sub>2</sub> T(CT) <sub>8</sub> CC(CT) <sub>9</sub> TTC                                                                                                                            |
|          | 2       | -2                  | 0                  | (CT) <sub>2</sub> GC(CT) <sub>2</sub> T(CT) <sub>8</sub> CC(CT) <sub>9</sub> TTC                                                                                                                            |
| Sheep    | 2,4     | 181                 | 58                 | (CT) <sub>2</sub> GC(CT) <sub>2</sub> T(CT) <sub>12</sub> CC(CT) <sub>9</sub> TTC                                                                                                                           |
|          | 3       | -8                  | -8                 | (CT) <sub>2</sub> GC(CT) <sub>2</sub> T(CT) <sub>10</sub> CC(CT) <sub>8</sub> C                                                                                                                             |
| Dolphin  | 1,3,4   | 172                 | 47                 | (CT) <sub>22</sub> TTC                                                                                                                                                                                      |
|          | 2       | -4                  | -4                 | (CT) <sub>26</sub> TTC                                                                                                                                                                                      |
| Hedgehog | 1,4     | 168                 | 49                 | (CT) <sub>2</sub> GCCTGCTT(CT) <sub>15</sub> TTC(T)3C                                                                                                                                                       |
|          | 2,3     | +2                  | +2                 | (CT) <sub>2</sub> GCCTGCTT(CT) <sub>16</sub> TTC(T)3C                                                                                                                                                       |
| Shrew    | 1       | 280                 | 99                 | CAT(TC) <sub>2</sub> TG(TC) <sub>2</sub> TG(CCTCT) <sub>2</sub> GC(CTCTGT) <sub>2</sub> (CT) <sub>4</sub> (GTCTCT) <sub>2</sub> (CTGTCT) <sub>2</sub> \\                                                    |
|          | 3       | 0                   | +2                 | \\(CT) <sub>6</sub> (C) <sub>3</sub> (T) <sub>3</sub> (CCCTCT) <sub>1</sub> (CT) <sub>2</sub> TTC                                                                                                           |
|          |         |                     |                    | CAT(TC) <sub>2</sub> TG(TC) <sub>2</sub> TG(CCTCT) <sub>2</sub> GC(CTCTGT) <sub>2</sub> (CT) <sub>4</sub> (GTCTCT) <sub>2</sub> (CTGTCT) <sub>2</sub> \\                                                    |
|          |         |                     |                    | \\(CT) <sub>7</sub> (C) <sub>3</sub> (T) <sub>3</sub> (CCCTCT) <sub>1</sub> (CT) <sub>2</sub> TTC                                                                                                           |
| Dugong   | 1,2,3,4 | 274                 |                    | (CT) <sub>2</sub> GC(CT) <sub>8</sub> GC(CT) <sub>3</sub> TT(CT) <sub>3</sub> CC(CT) <sub>7</sub> TTC                                                                                                       |
| Platypus | 1,4     | 223                 | 103                | CTGTTC(T) <sub>6</sub> C(A) <sub>5</sub> (T) <sub>5</sub> ATC(CCT) <sub>8</sub> (CTT) <sub>2</sub> T(CT) <sub>2</sub> T(CT) <sub>2</sub> CC(CT) <sub>4</sub> TT(CT) <sub>5</sub> (T)3A(T) <sub>7</sub> CCTC |
|          | 2       | -10                 | -9                 | CTGTTC(T) <sub>6</sub> C(A) <sub>5</sub> (T) <sub>5</sub> ATC(CCT) <sub>5</sub> (CTT) <sub>2</sub> T(CT) <sub>2</sub> T(CT) <sub>2</sub> CC(CT) <sub>4</sub> TT(CT) <sub>5</sub> (T)3A(T) <sub>7</sub> CCTC |
|          | 3       | -3                  | -3                 | CTGTTC(T) <sub>6</sub> C(A) <sub>5</sub> (T) <sub>5</sub> ATC(CCT) <sub>7</sub> (CTT) <sub>2</sub> T(CT) <sub>2</sub> T(CT) <sub>2</sub> CC(CT) <sub>4</sub> TT(CT) <sub>5</sub> (T)3A(T) <sub>7</sub> CCTC |

**C4-1514**

| Species    | Indiv   | L <sub>allele</sub> | L <sub>micro</sub> | Sequence                                                                                                                                                                                                               |
|------------|---------|---------------------|--------------------|------------------------------------------------------------------------------------------------------------------------------------------------------------------------------------------------------------------------|
| Human      | 1,2,3,4 | 283                 | 72                 | GA(CA) <sub>3</sub> AATA(CA) <sub>2</sub> CC(TG) <sub>2</sub> (CA) <sub>2</sub> TA(CA) <sub>4</sub> CGC(A) <sub>3</sub> (CA) <sub>8</sub> CT(CA) <sub>2</sub> AACA                                                     |
| Chimp      | 1,2     | <i>n/a</i>          | 70                 | GA(CA) <sub>3</sub> AATA(CA) <sub>2</sub> CC(TG) <sub>2</sub> (CA) <sub>2</sub> TA(CA) <sub>4</sub> CGC(A) <sub>3</sub> (CA) <sub>12</sub> AACA                                                                        |
|            | 3       |                     | +2                 | GA(CA) <sub>3</sub> AATA(CA) <sub>2</sub> CC(TG) <sub>2</sub> (CA) <sub>2</sub> TA(CA) <sub>4</sub> CGC(A) <sub>3</sub> (CA) <sub>11</sub> AACA                                                                        |
|            | 4       |                     | -1                 | GA(CA) <sub>3</sub> AATA(CA) <sub>2</sub> CC(TG) <sub>2</sub> (CA) <sub>2</sub> TA(CA) <sub>4</sub> CGC(A) <sub>3</sub> (CA) <sub>9</sub> C(AACA) <sub>2</sub>                                                         |
| Mouse      | 1,4     | 315                 | 104                | GATA(CA) <sub>5</sub> AAGACT(CA) <sub>2</sub> TA(C) <sub>4</sub> TGTA(CA) <sub>2</sub> TACATTCCT(GCAC) <sub>2</sub> A(CG) <sub>3</sub> (CA) <sub>4</sub> //                                                            |
|            | 2,3     | +2                  | +2                 | \\(CT) <sub>2</sub> (CA) <sub>10</sub> GTCTCG(CA) <sub>2</sub>                                                                                                                                                         |
|            |         |                     |                    | GATA(CA) <sub>5</sub> AAGACT(CA) <sub>2</sub> TA(C) <sub>4</sub> TGTA(CA) <sub>2</sub> TACATTCCT(GCAC) <sub>2</sub> A(CG) <sub>4</sub> (CA) <sub>3</sub> //                                                            |
|            |         |                     |                    | \\CT(CA) <sub>12</sub> GTCTCG(CA) <sub>2</sub>                                                                                                                                                                         |
| Rat        | 1,2,3   | 274                 | 66                 | GATA(CA) <sub>6</sub> AAGACT(CA) <sub>5</sub> (C) <sub>3</sub> TTGTA(CA) <sub>3</sub> CC(CA) <sub>5</sub> CC(CA) <sub>5</sub>                                                                                          |
|            | 4       | 0                   | 0                  | GATA(CA) <sub>6</sub> AAGACT(CA) <sub>4</sub> CTTGTA(CA) <sub>3</sub> CC(CA) <sub>5</sub> CC(CA) <sub>5</sub>                                                                                                          |
| Dog        | 1,2,3,4 | 297                 | 86                 | GA(CA) <sub>3</sub> AA(CA) <sub>3</sub> CC(TG) <sub>2</sub> (CA) <sub>2</sub> TA(CA) <sub>8</sub> CGCAACG(CA) <sub>2</sub> TA(CA) <sub>3</sub> CG(CA) <sub>2</sub> TA//                                                |
|            |         |                     |                    | \\(CA) <sub>5</sub> AACA                                                                                                                                                                                               |
| Cow        | 1,2,3,4 | 280                 | 70                 | GA(CA) <sub>3</sub> (A) <sub>4</sub> (CA) <sub>2</sub> CC(TG) <sub>2</sub> (CA) <sub>2</sub> TA(CA) <sub>2</sub> CGC(A) <sub>3</sub> (CA) <sub>5</sub> TACACGCTCACG(CA) <sub>2</sub> TA//                              |
|            |         |                     |                    | \\CA(C) <sub>3</sub> G                                                                                                                                                                                                 |
| Sheep      | 1,2,3,4 | 292                 | 80                 | TAGA(CA) <sub>3</sub> (A) <sub>4</sub> (CA) <sub>2</sub> CC(TG) <sub>2</sub> (CA) <sub>2</sub> TA(CA) <sub>2</sub> CGC(A) <sub>3</sub> (CA) <sub>5</sub> TACACGCTCACGA(TA) <sub>2</sub> //                             |
|            |         |                     |                    | \\(CA) <sub>3</sub> TACA(C) <sub>3</sub> G                                                                                                                                                                             |
| Dolphin    | 2       | 291                 | 79                 | CAGA(CA) <sub>3</sub> AATA(CA) <sub>2</sub> CC(TG) <sub>2</sub> (CA) <sub>2</sub> TA(CA) <sub>6</sub> AACACGCATA(CA) <sub>10</sub> TA(CA) <sub>3</sub>                                                                 |
|            | 3,4     | 0                   | 0                  | CAGA(CA) <sub>3</sub> AATA(CA) <sub>2</sub> CC(TG) <sub>2</sub> (CA) <sub>2</sub> TA(CA) <sub>6</sub> AACACGCATA(CA) <sub>7</sub> CG(CA) <sub>2</sub> TA(CA) <sub>3</sub>                                              |
| P. Whale   | 1,2,3   | 292                 | 79                 | CAGA(CA) <sub>3</sub> AATA(CA) <sub>2</sub> CC(TG) <sub>2</sub> (CA) <sub>2</sub> TA(CA) <sub>6</sub> AACACGCATA(CA) <sub>7</sub> CG(CA) <sub>2</sub> TA(CA) <sub>3</sub>                                              |
| Hedgehog   | 1,3     | 322                 | 117                | (CA) <sub>5</sub> (A) <sub>3</sub> TA(CA) <sub>3</sub> CC(T) <sub>3</sub> (GC) <sub>2</sub> AC(GC) <sub>2</sub> GT(GC) <sub>3</sub> A(CA) <sub>2</sub> TA(CA) <sub>15</sub> TATGC(A) <sub>3</sub> (CA) <sub>7</sub> // |
|            |         |                     |                    | \\TA(CA) <sub>3</sub> AATA                                                                                                                                                                                             |
|            | 2,4     | -2                  | -2                 | (CA) <sub>5</sub> (A) <sub>3</sub> TA(CA) <sub>3</sub> CC(T) <sub>3</sub> (GC) <sub>2</sub> AC(GC) <sub>2</sub> GT(GC) <sub>3</sub> A(CA) <sub>2</sub> TA(CA) <sub>14</sub> TATGC(A) <sub>3</sub> (CA) <sub>7</sub> // |
|            |         |                     |                    | \\TA(CA) <sub>3</sub> AATA                                                                                                                                                                                             |
| Shrew      | 1,2,4   | 281                 | 69                 | CAGA(CA) <sub>3</sub> AATA(CA) <sub>2</sub> CC(TG) <sub>2</sub> (CA) <sub>2</sub> TA(CA) <sub>4</sub> CG(A) <sub>3</sub> (CA) <sub>4</sub> CG(CA) <sub>2</sub> TA(CA) <sub>3</sub> GACA                                |
|            | 3       | 0                   | 0                  | CAGA(CA) <sub>3</sub> AATA(CA) <sub>2</sub> CC(TG) <sub>2</sub> (CA) <sub>2</sub> TACACG(CA) <sub>2</sub> CG(A) <sub>3</sub> (CA) <sub>4</sub> CG(CA) <sub>2</sub> //                                                  |
|            |         |                     |                    | \\TA(CA) <sub>3</sub> GACA                                                                                                                                                                                             |
| Dugong     | 1,2,3,4 | 274                 | 67                 | CAGA(CA) <sub>3</sub> AATA(CA) <sub>2</sub> CC(TG) <sub>2</sub> (CA) <sub>2</sub> TA(CA) <sub>3</sub> AA(CA) <sub>4</sub> CT(CA) <sub>3</sub> (CG) <sub>2</sub> CATAC(A) <sub>3</sub> CA                               |
| Tenrec     | 1,2,3,4 | 281                 | 64                 | AGA(CA) <sub>4</sub> AA(CA) <sub>3</sub> CG(TG) <sub>2</sub> (CA) <sub>2</sub> TCCAC(GC) <sub>2</sub> (A) <sub>3</sub> CACG(CA) <sub>2</sub> CTCACG(CA) <sub>4</sub> GATG                                              |
| T. wallaby | 1,2,3,4 | 281                 | 73                 | C(A) <sub>3</sub> (CA) <sub>5</sub> (CATA) <sub>2</sub> CCT(TG) <sub>3</sub> (CA) <sub>2</sub> CG(CA) <sub>2</sub> TG(CA) <sub>2</sub> CT(CA) <sub>2</sub> (CG) <sub>2</sub> (CA) <sub>6</sub> TCAG                    |
| Quoll      | 1,3,4   | 295                 | 89                 | CAGA(CA) <sub>3</sub> TGCCT(G) <sub>3</sub> TG(CA) <sub>2</sub> (C) <sub>3</sub> GCCA(G) <sub>3</sub> CA(C) <sub>3</sub> ACGTG(CA) <sub>2</sub> CG(CA) <sub>4</sub> (C) <sub>3</sub> ACG(CGCA) <sub>2</sub> CAC        |
|            |         |                     |                    | G(CA) <sub>4</sub> CC                                                                                                                                                                                                  |
| Echidna    | 1,2,3,4 | 317                 | 96                 | (CA) <sub>3</sub> GACATACCAACG(CA) <sub>2</sub> TA(CA) <sub>4</sub> TGCAGGCACG(CA) <sub>3</sub> GACACG(CA) <sub>2</sub> C(CA) <sub>2</sub> (CCCA) <sub>2</sub> CA(C                                                    |
|            |         |                     |                    | CCACA) <sub>2</sub> (CA) <sub>3</sub> GAACA                                                                                                                                                                            |

**C17-4243**

| Species  | Indiv   | L <sub>allele</sub> | L <sub>micro</sub> | Sequence                                                                                                                                             |
|----------|---------|---------------------|--------------------|------------------------------------------------------------------------------------------------------------------------------------------------------|
| Human    | 1,2,3,4 | 311                 | 56                 | (TTC) <sub>2</sub> (TC) <sub>7</sub> CC(TC) <sub>5</sub> (C) <sub>4</sub> (TC) <sub>3</sub> (T) <sub>8</sub> (TC) <sub>2</sub>                       |
| Dolphin  | 1,2,3,4 | 303                 |                    | (TC) <sub>2</sub> (T) <sub>4</sub> (TC) <sub>3</sub> CC(TC) <sub>4</sub> (C) <sub>4</sub> (TC) <sub>3</sub> (T) <sub>7</sub> (TC) <sub>2</sub>       |
| Tenrec   | 1,2,4   | 316                 | 61                 | TGTC(T) <sub>4</sub> (TC) <sub>5</sub> CC(TC) <sub>5</sub> (C) <sub>4</sub> (TC) <sub>3</sub> CC(TC) <sub>4</sub> (T) <sub>7</sub> (TC) <sub>2</sub> |
|          | 3       | +2                  | +2                 | TGTC(T) <sub>4</sub> (TC) <sub>6</sub> CC(TC) <sub>5</sub> (C) <sub>4</sub> (TC) <sub>3</sub> CC(TC) <sub>4</sub> (T) <sub>7</sub> (TC) <sub>2</sub> |
| Echidna  | 1,2,3,4 | 298                 | 43                 | (TC) <sub>2</sub> (T) <sub>4</sub> (TC) <sub>4</sub> CCTCGC(TC) <sub>2</sub> CC(TC) <sub>3</sub> (T) <sub>6</sub> CTT                                |
| Platypus | 1,2,3,4 | 298                 | 43                 | (TC) <sub>2</sub> (T) <sub>4</sub> (TC) <sub>4</sub> CCTTGC(TC) <sub>2</sub> CC(TC) <sub>3</sub> (T) <sub>6</sub> CTT                                |
